# Supplementary material for: Proteomics for studying the effects of L. rhamnosus LV108 against non-alcoholic fatty liver disease in rats
Source: RSC Adv. 2018 Nov 15;8(67):38517–28. doi: 10.1039/c8ra06771f (PMC9090571; doi:10.1039/c8ra06771f)
Supplement: RA-008-C8RA06771F-s001 [file RA-008-C8RA06771F-s001.xlsx]

## Sheet: S1
Accession	Description	Coverage	Unique Peptides	Peptides	PSMs	AAs	MW [kDa]	calc. pI	N1/REF	N2/REF	N3/REF	average N	M1/REF	M2/REF	M3/REF	average M	M/N	t test p value
P19225	Cytochrome P450 2C70 OS=Rattus norvegicus GN=Cyp2c70 PE=2 SV=1 - [CP270_RAT]	40.7	19	22	119	489	56.1199	8.01611	0.641431	0.676985	0.664279	0.660898	1.19722	1.19902	1.18963	1.19529	1.80858	9.953e-07
G3V9D8	Carboxylic ester hydrolase OS=Rattus norvegicus GN=LOC108348093 PE=1 SV=1 - [G3V9D8_RAT]	19.43	6	10	55	561	62.1301	5.92236	0.702515	0.710484	0.724944	0.712648	1.11612	1.13033	1.13965	1.1287	1.58381	1.61313e-06
P07687	Epoxide hydrolase 1 OS=Rattus norvegicus GN=Ephx1 PE=1 SV=1 - [HYEP_RAT]	51.87	26	26	468	455	52.5478	8.51416	0.70584	0.659778	0.689743	0.68512	1.18725	1.18965	1.18413	1.18701	1.73256	3.21041e-06
P18125	Cholesterol 7-alpha-monooxygenase OS=Rattus norvegicus GN=Cyp7a1 PE=1 SV=1 - [CP7A1_RAT]	9.94	4	5	6	503	56.846	8.38232	0.755024	0.772326	0.754018	0.760456	1.06004	1.0767	1.05375	1.0635	1.3985	4.77469e-06
Q562C4	Methyltransferase-like protein 7B OS=Rattus norvegicus GN=Mettl7b PE=1 SV=1 - [MET7B_RAT]	54.51	12	12	99	244	27.8855	8.27979	0.757387	0.770022	0.761456	0.762955	1.11201	1.10023	1.13447	1.11557	1.46217	5.07554e-06
P55159	Serum paraoxonase/arylesterase 1 OS=Rattus norvegicus GN=Pon1 PE=1 SV=3 - [PON1_RAT]	48.45	14	14	101	355	39.3331	5.22412	0.752344	0.773825	0.750558	0.758909	1.08343	1.11015	1.11177	1.10178	1.4518	8.48466e-06
Q6AYS8	Estradiol 17-beta-dehydrogenase 11 OS=Rattus norvegicus GN=Hsd17b11 PE=2 SV=1 - [DHB11_RAT]	46.64	10	12	83	298	32.9166	8.63135	0.674241	0.688091	0.69356	0.685297	1.10444	1.13143	1.16167	1.13251	1.65259	1.39328e-05
P07896	Peroxisomal bifunctional enzyme OS=Rattus norvegicus GN=Ehhadh PE=1 SV=2 - [ECHP_RAT]	64.54	43	43	342	722	78.6083	9.20264	0.877679	0.891429	0.867234	0.878781	1.07578	1.06523	1.08005	1.07369	1.22179	1.92615e-05
P05183	Cytochrome P450 3A2 OS=Rattus norvegicus GN=Cyp3a2 PE=1 SV=2 - [CP3A2_RAT]	49.6	12	25	292	504	57.6943	8.76318	0.701609	0.686298	0.725146	0.704351	1.09182	1.13118	1.13435	1.11912	1.58886	1.98411e-05
F1LRQ1	Aldehyde oxidase 1 OS=Rattus norvegicus GN=Aox1 PE=1 SV=3 - [F1LRQ1_RAT]	40.59	44	48	205	1333	146.803	6.96143	0.845294	0.836069	0.836729	0.839364	1.05729	1.08716	1.08758	1.07734	1.28352	2.20966e-05
B2RZ37	Receptor expression-enhancing protein 5 OS=Rattus norvegicus GN=Reep5 PE=1 SV=1 - [REEP5_RAT]	30.16	5	7	17	189	21.417	8.11865	0.739288	0.709725	0.752654	0.733889	1.10695	1.14878	1.13313	1.12962	1.53923	2.31705e-05
P16303	Carboxylesterase 1D OS=Rattus norvegicus GN=Ces1d PE=1 SV=2 - [CES1D_RAT]	44.25	5	21	512	565	62.1077	6.53662	0.787337	0.782014	0.803434	0.790928	1.09613	1.10456	1.14028	1.11366	1.40804	2.75019e-05
Q6AXY8	Dehydrogenase/reductase (SDR family) member 1 OS=Rattus norvegicus GN=Dhrs1 PE=1 SV=1 - [Q6AXY8_RAT]	46.65	11	11	44	313	33.9934	8.20654	0.749447	0.699606	0.735374	0.728142	1.11862	1.10019	1.13713	1.11865	1.5363	2.83349e-05
P51647	Retinal dehydrogenase 1 OS=Rattus norvegicus GN=Aldh1a1 PE=1 SV=3 - [AL1A1_RAT]	57.49	14	27	282	501	54.424	7.82568	0.627454	0.614263	0.661445	0.634387	1.12307	1.18735	1.19157	1.16733	1.84009	3.4716e-05
Q8K3R0	Carboxylic ester hydrolase OS=Rattus norvegicus GN=Ces2a PE=2 SV=1 - [Q8K3R0_RAT]	40.32	12	18	95	558	61.7625	6.66846	0.772637	0.806848	0.802496	0.793994	1.10394	1.15206	1.12563	1.12721	1.41968	4.56731e-05
Q5EB77	Ras-related protein Rab-18 OS=Rattus norvegicus GN=Rab18 PE=2 SV=1 - [RAB18_RAT]	66.02	12	12	59	206	22.9616	5.23682	0.785126	0.824537	0.768861	0.792842	1.10278	1.09005	1.10012	1.09765	1.38445	5.65736e-05
Q5U2U5	Perilipin OS=Rattus norvegicus GN=Plin2 PE=2 SV=1 - [Q5U2U5_RAT]	53.32	21	21	85	422	46.2347	7.04932	0.567495	0.585314	0.582729	0.578513	1.22863	1.14547	1.12088	1.165	2.01378	5.94017e-05
Q64550	UDP-glucuronosyltransferase 1-1 OS=Rattus norvegicus GN=Ugt1a1 PE=1 SV=1 - [UD11_RAT]	29.53	7	14	133	535	59.6238	8.48486	0.741632	0.750872	0.739446	0.743983	1.08624	1.15557	1.09221	1.11134	1.49377	8.17548e-05
F1LNW3	Acyl-coenzyme A oxidase OS=Rattus norvegicus GN=Acox2 PE=1 SV=1 - [F1LNW3_RAT]	53.89	3	33	184	681	76.6979	7.7085	0.85525	0.88295	0.87486	0.87102	1.037	1.06188	1.04464	1.04784	1.20301	8.86563e-05
Q32Q55	Carboxylic ester hydrolase OS=Rattus norvegicus GN=Ces2h PE=1 SV=1 - [Q32Q55_RAT]	16.49	6	9	24	558	62.3704	6.34131	0.882254	0.90082	0.857142	0.880072	1.08933	1.083	1.10206	1.09146	1.2402	0.000107193
P27615	Lysosome membrane protein 2 OS=Rattus norvegicus GN=Scarb2 PE=1 SV=2 - [SCRB2_RAT]	11.51	7	7	16	478	54.0564	5.0083	0.824443	0.839722	0.874338	0.846168	1.09068	1.08279	1.07303	1.08217	1.2789	0.000111769
P27605	Hypoxanthine-guanine phosphoribosyltransferase OS=Rattus norvegicus GN=Hprt1 PE=1 SV=1 - [HPRT_RAT]	63.3	10	10	60	218	24.4615	6.53662	0.861965	0.86728	0.876156	0.868467	1.03434	1.0665	1.07419	1.05834	1.21863	0.000123457
D3ZLR6	UDP-glucuronosyltransferase OS=Rattus norvegicus GN=Ugt2b15 PE=1 SV=3 - [D3ZLR6_RAT]	32.45	7	16	215	530	60.438	8.39697	0.864757	0.87342	0.862066	0.866748	1.07216	1.07883	1.03609	1.06236	1.22568	0.000140185
Q8VD45	UDP-glucuronosyltransferase OS=Rattus norvegicus GN=Ugt1a5 PE=2 SV=1 - [Q8VD45_RAT]	27.31	6	13	112	531	59.974	8.68994	0.816371	0.764677	0.827498	0.802849	1.10246	1.12422	1.14299	1.12322	1.39905	0.000144338
Q06884	Cytochrome P-450 OS=Rattus norvegicus GN=Cyp3a23/3a1 PE=1 SV=1 - [Q06884_RAT]	48.61	3	26	179	502	57.6379	8.67529	0.739513	0.716155	0.78699	0.747552	1.09563	1.15101	1.14389	1.13018	1.51184	0.000147063
Q63276	Bile acid-CoA:amino acid N-acyltransferase OS=Rattus norvegicus GN=Baat PE=1 SV=2 - [BAAT_RAT]	55.71	19	19	278	420	46.435	7.41553	0.884456	0.88189	0.882935	0.883094	1.0486	1.04599	1.08485	1.05981	1.20011	0.000148178
Q64573	Liver carboxylesterase 4 OS=Rattus norvegicus PE=2 SV=2 - [EST4_RAT]	47.42	12	25	178	561	62.2687	6.75635	0.867208	0.853402	0.848007	0.856206	1.06235	1.06622	1.1095	1.07936	1.26063	0.000159303
P24470	Cytochrome P450 2C23 OS=Rattus norvegicus GN=Cyp2c23 PE=2 SV=2 - [CP2CN_RAT]	55.47	24	25	208	494	56.3966	8.42627	0.83804	0.821347	0.809725	0.823037	1.05288	1.11218	1.08942	1.08483	1.31808	0.000165039
D3Z8I7	Glutathione S-transferase, theta 3 OS=Rattus norvegicus GN=Gstt3 PE=1 SV=1 - [D3Z8I7_RAT]	25.71	4	5	67	210	23.3661	9.08545	0.872513	0.866014	0.848605	0.862378	1.04591	1.06493	1.09689	1.06925	1.23988	0.000232724
P38918	Aflatoxin B1 aldehyde reductase member 3 OS=Rattus norvegicus GN=Akr7a3 PE=1 SV=2 - [ARK73_RAT]	33.03	10	10	69	327	36.7233	7.23975	0.776404	0.769031	0.758232	0.767889	1.08805	1.17623	1.17922	1.14783	1.49479	0.0002348
P00173	Cytochrome b5 OS=Rattus norvegicus GN=Cyb5a PE=1 SV=2 - [CYB5_RAT]	63.43	8	8	297	134	15.3456	4.98291	0.886894	0.846854	0.880624	0.871458	1.07598	1.049	1.08473	1.06991	1.22772	0.000270095
P97524	Very long-chain acyl-CoA synthetase OS=Rattus norvegicus GN=Slc27a2 PE=1 SV=1 - [S27A2_RAT]	52.58	32	33	234	620	70.6485	8.5874	0.843639	0.834603	0.873523	0.850589	1.0448	1.05509	1.0889	1.06293	1.24964	0.000280848
A0A140TAE6	Enoyl-[acyl-carrier-protein] reductase, mitochondrial OS=Rattus norvegicus GN=Mecr PE=1 SV=1 - [A0A140TAE6_RAT]	34.05	10	10	26	373	40.3092	8.77783	0.880129	0.867191	0.866515	0.871278	1.05209	1.04592	1.09777	1.06526	1.22264	0.000332009
G3V635	Cytochrome P450 3A18 OS=Rattus norvegicus GN=Cyp3a18 PE=1 SV=1 - [G3V635_RAT]	43.66	19	22	132	497	57.2426	8.98291	0.763868	0.802333	0.821497	0.795899	1.06438	1.08085	1.13124	1.09216	1.37223	0.000353707
P00388	NADPH--cytochrome P450 reductase OS=Rattus norvegicus GN=Por PE=1 SV=3 - [NCPR_RAT]	53.54	35	35	178	678	76.9142	5.47803	0.876788	0.865674	0.883775	0.875412	1.07063	1.04611	1.10649	1.07441	1.22732	0.000406763
P46418	Glutathione S-transferase alpha-5 OS=Rattus norvegicus GN=Gsta5 PE=1 SV=2 - [GSTA5_RAT]	45.25	4	12	86	221	25.3312	8.42627	0.714248	0.633839	0.751093	0.699726	1.14238	1.15014	1.22768	1.1734	1.67694	0.000423909
Q3KRE2	Methyltransferase like 7A, isoform CRA_b OS=Rattus norvegicus GN=Mettl7a PE=1 SV=1 - [Q3KRE2_RAT]	35.66	7	7	36	244	28.1234	8.45557	0.817407	0.810601	0.773419	0.800476	1.08347	1.05335	1.13448	1.09043	1.36223	0.000447562
A0A140UHX9	CCZ1 homolog B, vacuolar protein-trafficking and biogenesis-associated OS=Rattus norvegicus GN=Ccz1b PE=1 SV=1 - [A0A140UHX9_RAT]	3.75	2	2	2	480	55.5611	6.02393	0.796441	0.84494	0.825514	0.822298	1.05904	1.00857	1.04309	1.0369	1.26098	0.000471004
P70580	Membrane-associated progesterone receptor component 1 OS=Rattus norvegicus GN=Pgrmc1 PE=1 SV=3 - [PGRC1_RAT]	67.69	11	13	123	195	21.5847	4.60205	0.846138	0.876635	0.870326	0.864366	1.09211	1.04408	1.10568	1.08063	1.25019	0.00048953
Q6AYT9	Acyl-coenzyme A synthetase ACSM5, mitochondrial OS=Rattus norvegicus GN=Acsm5 PE=2 SV=1 - [ACSM5_RAT]	26.12	11	12	69	578	64.5819	7.89893	0.809873	0.848047	0.775864	0.811262	1.08163	1.07099	1.12831	1.09364	1.34808	0.000492078
A1L128	Alcohol dehydrogenase 4 OS=Rattus norvegicus GN=Adh4 PE=1 SV=1 - [A1L128_RAT]	43.24	13	13	56	377	40.1945	7.85498	0.901272	0.855602	0.88934	0.882071	1.04031	1.07775	1.06754	1.06187	1.20383	0.000524367
D3ZJZ0	RGD1563250 (Predicted), isoform CRA_a OS=Rattus norvegicus GN=Tmem205 PE=1 SV=1 - [D3ZJZ0_RAT]	26.98	4	4	54	189	21.1712	8.60205	0.887063	0.831634	0.823377	0.847358	1.05465	1.07378	1.09505	1.0745	1.26805	0.000604991
O35913	Solute carrier organic anion transporter family member 1A4 OS=Rattus norvegicus GN=Slco1a4 PE=2 SV=1 - [SO1A4_RAT]	24.96	11	14	69	661	73.2031	7.86963	0.843535	0.799969	0.854893	0.832799	1.09441	1.06045	1.13426	1.09637	1.31649	0.000627043
P97852	Peroxisomal multifunctional enzyme type 2 OS=Rattus norvegicus GN=Hsd17b4 PE=1 SV=3 - [DHB4_RAT]	56.73	35	35	255	735	79.378	8.57275	0.900576	0.875374	0.862377	0.879442	1.06672	1.03822	1.0936	1.06618	1.21233	0.00066838
A0A0G2JY53	Myosin, heavy chain 15 OS=Rattus norvegicus GN=Myh15 PE=3 SV=1 - [A0A0G2JY53_RAT]	0.68	1	1	1	1915	220.154	6.26514	0.854398	0.859562	0.803623	0.839194	1.10531	1.04753	1.0679	1.07358	1.2793	0.000676785
D4A147	UDP-glucuronosyltransferase OS=Rattus norvegicus GN=Ugt2a3 PE=1 SV=3 - [D4A147_RAT]	12.22	7	7	34	532	60.6714	8.30908	0.836394	0.797124	0.822212	0.818577	1.03731	1.12097	1.06738	1.07522	1.31352	0.000686365
Q62818	Translation initiation factor eIF-2B subunit beta OS=Rattus norvegicus GN=Eif2b2 PE=2 SV=1 - [EI2BB_RAT]	5.13	1	1	1	351	38.8508	6.20166	0.673123	0.624288	0.674357	0.657256	1.26399	1.5075	1.50041	1.42397	2.16653	0.000718203
P24268	Cathepsin D OS=Rattus norvegicus GN=Ctsd PE=1 SV=1 - [CATD_RAT]	33.42	12	12	50	407	44.6519	7.09326	0.829536	0.840343	0.829683	0.833188	1.02925	1.05242	1.11266	1.06477	1.27795	0.000768561
F1LPB8	Ectonucleoside triphosphate diphosphohydrolase 5 OS=Rattus norvegicus GN=Entpd5 PE=1 SV=2 - [F1LPB8_RAT]	37	10	10	39	427	47.3608	5.16064	0.878232	0.904682	0.884874	0.889262	1.07671	1.04402	1.11242	1.07772	1.21192	0.000899361
P09875	UDP-glucuronosyltransferase 2B1 OS=Rattus norvegicus GN=Ugt2b1 PE=2 SV=1 - [UD2B1_RAT]	39.13	14	17	130	529	60.4452	8.41162	0.834196	0.733396	0.85266	0.806751	1.14848	1.11856	1.14736	1.13813	1.41076	0.000984948
P52944	PDZ and LIM domain protein 1 OS=Rattus norvegicus GN=Pdlim1 PE=1 SV=4 - [PDLI1_RAT]	52.6	13	13	40	327	35.5618	7.23975	0.781334	0.820431	0.837995	0.813253	1.09536	1.13119	1.03793	1.08816	1.33804	0.000997626
A0A096MJ39	Platelet glycoprotein 4 OS=Rattus norvegicus GN=Cd36 PE=1 SV=1 - [A0A096MJ39_RAT]	4.45	3	3	6	472	52.7113	8.646	0.810573	0.869864	0.87735	0.852596	1.03017	1.05543	1.05248	1.04603	1.22687	0.0010192
P07871	3-ketoacyl-CoA thiolase B, peroxisomal OS=Rattus norvegicus GN=Acaa1b PE=1 SV=2 - [THIKB_RAT]	59.67	2	18	130	424	43.7927	8.22119	0.655985	0.634818	0.703815	0.664873	1.0615	1.13638	1.25079	1.14956	1.72899	0.00117372
P21816	Cysteine dioxygenase type 1 OS=Rattus norvegicus GN=Cdo1 PE=1 SV=1 - [CDO1_RAT]	26	5	6	21	200	23.0114	6.45557	0.751678	0.719165	0.812756	0.7612	1.15211	1.04678	1.087	1.09529	1.4389	0.0012531
A0A0G2K727	UDP-glucuronosyltransferase OS=Rattus norvegicus GN=Ugt2b35 PE=1 SV=1 - [A0A0G2K727_RAT]	30.32	1	14	99	442	50.5365	6.7124	0.908131	0.853552	0.868751	0.876811	1.07059	1.02906	1.08287	1.06084	1.20988	0.00132565
P36365	Dimethylaniline monooxygenase [N-oxide-forming] 1 OS=Rattus norvegicus GN=Fmo1 PE=1 SV=2 - [FMO1_RAT]	46.99	23	23	104	532	59.7867	8.27979	0.888811	0.880655	0.851506	0.873658	1.01819	1.06957	1.08454	1.05743	1.21035	0.00134438
G3V734	2,4-dienoyl CoA reductase 1, mitochondrial, isoform CRA_a OS=Rattus norvegicus GN=Decr1 PE=1 SV=1 - [G3V734_RAT]	48.06	14	14	240	335	36.1097	8.93896	0.918687	0.857764	0.88898	0.888477	1.04971	1.05794	1.09633	1.06799	1.20205	0.00138544
P45479	Palmitoyl-protein thioesterase 1 OS=Rattus norvegicus GN=Ppt1 PE=1 SV=1 - [PPT1_RAT]	24.18	6	6	11	306	34.4324	7.43018	0.777209	0.832316	0.870644	0.826723	1.0375	1.07944	1.06635	1.0611	1.2835	0.00141482
B3DM86	Srxn1 protein (Fragment) OS=Rattus norvegicus GN=Srxn1 PE=2 SV=1 - [B3DM86_RAT]	6.67	1	1	1	135	14.1853	6.771	0.893455	0.853929	0.906829	0.884738	1.06323	1.06413	1.12683	1.08473	1.22605	0.00162082
D4AA05	Carboxylic ester hydrolase OS=Rattus norvegicus GN=Ces1a PE=1 SV=1 - [D4AA05_RAT]	8.53	2	3	3	563	62.3224	5.22412	0.831341	0.798306	0.750498	0.793382	1.05888	1.09847	1.00842	1.05526	1.33007	0.00171848
P97886	UDP-glucuronosyltransferase OS=Rattus norvegicus GN=UGT1 PE=2 SV=1 - [P97886_RAT]	33.96	8	15	111	530	60.2099	8.68994	0.881431	0.855258	0.797812	0.844834	1.05288	1.0874	1.12966	1.08998	1.29017	0.00179501
D3ZHL7	Prospero homeobox 2 OS=Rattus norvegicus GN=Prox2 PE=4 SV=2 - [D3ZHL7_RAT]	1.69	1	1	1	593	65.2122	8.98291	0.816458	0.757214	0.664033	0.745902	1.14747	1.10953	1.23021	1.1624	1.55839	0.00185308
F1LM22	UDP-glucuronosyltransferase OS=Rattus norvegicus GN=Ugt2b PE=1 SV=2 - [F1LM22_RAT]	38.3	1	17	210	530	60.9556	8.49951	0.882158	0.922237	0.824485	0.876293	1.07807	1.06653	1.08511	1.07657	1.22855	0.00227126
Q569D0	Sulfotransferase OS=Rattus norvegicus GN=Sult1c2a PE=2 SV=1 - [Q569D0_RAT]	25.68	8	9	59	296	34.8524	7.40088	0.846922	0.763323	0.87699	0.829079	1.06265	1.06509	1.06637	1.0647	1.2842	0.00228148
P23965	Enoyl-CoA delta isomerase 1, mitochondrial OS=Rattus norvegicus GN=Eci1 PE=1 SV=1 - [ECI1_RAT]	39.79	12	12	168	289	32.234	9.53955	0.887595	0.834818	0.917262	0.879892	1.05646	1.05756	1.1012	1.07174	1.21804	0.00245679
Q9QXT3	N-acetyltransferase 8 OS=Rattus norvegicus GN=Nat8 PE=1 SV=1 - [NAT8_RAT]	22.07	4	6	8	222	24.8782	9.05615	0.89328	0.855001	0.826732	0.858337	1.03059	1.09167	1.1243	1.08219	1.26079	0.00262445
F1LRA5	Proteoglycan 4 OS=Rattus norvegicus GN=Prg4 PE=1 SV=2 - [F1LRA5_RAT]	4.53	1	1	1	1060	115.743	8.96826	0.801383	0.836204	0.855148	0.830912	1.08844	1.09474	0.996807	1.06	1.2757	0.00292155
A0A0G2JY66	Carboxylic ester hydrolase OS=Rattus norvegicus GN=Ces1d PE=1 SV=1 - [A0A0G2JY66_RAT]	38.83	1	18	384	564	62.0247	6.41748	0.862465	0.897	0.82466	0.861375	1.20437	1.0741	1.13709	1.13852	1.32174	0.00298852
Q5XIJ6	BRISC and BRCA1-A complex member 1 OS=Rattus norvegicus GN=Babam1 PE=1 SV=1 - [BABA1_RAT]	2.69	1	1	1	334	36.8547	4.55127	0.841339	0.591823	0.796014	0.743059	1.7067	1.39663	1.4616	1.52164	2.04781	0.00306191
F1LRF5	Transmembrane protein 116 OS=Rattus norvegicus GN=Tmem116 PE=4 SV=2 - [F1LRF5_RAT]	3.16	1	1	1	348	38.5449	8.39697	0.899721	0.881755	0.967513	0.91633	1.15536	1.1024	1.09949	1.11908	1.22127	0.00310581
P85007	Immediate early response 3-interacting protein 1 OS=Rattus norvegicus GN=Ier3ip1 PE=3 SV=1 - [IR3IP_RAT]	34.15	2	2	5	82	8.99295	8.22119	0.905136	0.837433	0.879259	0.873943	1.07979	1.02566	1.10779	1.07108	1.22557	0.00318918
F1LTB8	UDP-glucuronosyltransferase OS=Rattus norvegicus GN=RGD1559459 PE=1 SV=2 - [F1LTB8_RAT]	20.75	3	10	88	530	60.2712	8.01611	0.826071	0.901621	0.848304	0.858666	1.03165	1.09381	1.02925	1.05157	1.22466	0.00331799
P10959	Carboxylesterase 1C OS=Rattus norvegicus GN=Ces1c PE=1 SV=3 - [EST1C_RAT]	26.23	2	13	84	549	60.1365	5.73193	0.807426	0.920109	0.859267	0.862267	1.10764	1.06794	1.0643	1.07996	1.25247	0.00354606
B3VPA7	Cysteine-sulfinate decarboxylase OS=Rattus norvegicus GN=Csad PE=2 SV=1 - [B3VPA7_RAT]	54.56	26	26	196	493	55.1795	7.23975	0.848879	0.678492	0.871395	0.799589	1.16909	1.15732	1.18429	1.17023	1.46354	0.00379582
M0R5Y4	Myotilin-like OS=Rattus norvegicus GN=LOC100909868 PE=4 SV=1 - [M0R5Y4_RAT]	3.97	1	1	1	378	42.4376	8.76318	0.74878	0.739684	0.706391	0.731618	1.35862	1.25862	1.07656	1.23126	1.68293	0.00393226
D4A899	Vacuolar protein sorting 13 homolog A OS=Rattus norvegicus GN=Vps13a PE=1 SV=2 - [D4A899_RAT]	0.34	1	1	1	2335	266.324	5.64307	0.86925	0.905492	0.797047	0.857263	1.0492	1.07867	1.04171	1.05653	1.23244	0.00414607
G3V7V6	All-trans-13,14-dihydroretinol saturase, isoform CRA_b OS=Rattus norvegicus GN=Retsat PE=1 SV=1 - [G3V7V6_RAT]	46.47	28	28	190	609	67.4343	8.80713	0.894142	0.803164	0.88112	0.859476	1.02016	1.07104	1.07648	1.0559	1.22854	0.00426747
M0R7R1	Carboxylic ester hydrolase OS=Rattus norvegicus GN=Ces1f PE=1 SV=2 - [M0R7R1_RAT]	47.77	12	25	136	561	62.3266	6.59521	0.91823	0.812197	0.885786	0.872071	1.07762	1.05262	1.11774	1.08266	1.24148	0.00454978
D3ZXQ0	Carboxylic ester hydrolase OS=Rattus norvegicus GN=Ces2g PE=1 SV=1 - [D3ZXQ0_RAT]	17.68	5	10	30	560	62.8683	6.49365	0.887664	0.862868	0.812285	0.854272	1.07307	1.04346	1.16208	1.09287	1.2793	0.00473248
P05178	Cytochrome P450 2C6 OS=Rattus norvegicus GN=Cyp2c6 PE=2 SV=2 - [CP2C6_RAT]	40	1	19	147	490	55.9668	7.47412	0.820688	0.853349	0.904498	0.859511	1.00223	1.05431	1.07551	1.04401	1.21466	0.00485425
A0JPN2	Zinc transporter ZIP4 OS=Rattus norvegicus GN=Slc39a4 PE=2 SV=1 - [S39A4_RAT]	2.59	1	1	1	656	71.0762	5.36377	0.842463	0.91367	0.851689	0.869274	1.0537	1.1997	1.15377	1.13572	1.30652	0.00537109
A0A0G2K5K4	Cytochrome P450, family 3, subfamily a, polypeptide 62 OS=Rattus norvegicus GN=Cyp3a9 PE=1 SV=1 - [A0A0G2K5K4_RAT]	13.15	1	6	43	479	55.0107	9.11475	0.724547	0.691785	0.858037	0.758123	1.02351	1.09258	1.04772	1.0546	1.39107	0.00562489
F1LMT8	Rab3 GTPase-activating protein non-catalytic subunit OS=Rattus norvegicus GN=Rab3gap2 PE=1 SV=3 - [F1LMT8_RAT]	1.84	2	2	2	1362	151.514	5.93506	0.877189	0.856726	0.912017	0.881977	1.10782	1.08724	1.00628	1.06711	1.20991	0.00609354
Q5FVR5	Acyl-coenzyme A amino acid N-acyltransferase 2 OS=Rattus norvegicus GN=Acnat2 PE=2 SV=1 - [ACNT2_RAT]	36.12	13	13	43	418	45.9809	8.32373	0.855411	0.940635	0.830494	0.875513	1.05101	1.0449	1.07856	1.05816	1.20861	0.00637966
D3ZT64	Autophagy-related 2A OS=Rattus norvegicus GN=Atg2a PE=1 SV=1 - [D3ZT64_RAT]	0.57	1	1	1	1916	211.232	5.99854	0.787612	0.891479	0.817696	0.832262	1.10243	1.04133	1.00006	1.04794	1.25914	0.00731829
M0R436	Ring finger protein 170 OS=Rattus norvegicus GN=Rnf170 PE=1 SV=2 - [M0R436_RAT]	17.9	4	4	5	257	29.7341	5.41455	0.873282	0.895582	0.765707	0.844857	1.02955	1.0814	1.04572	1.05223	1.24545	0.0084527
D3Z9R7	Syntaxin 16 OS=Rattus norvegicus GN=Stx16 PE=1 SV=1 - [D3Z9R7_RAT]	4.32	1	1	4	139	15.9904	4.98291	0.790818	0.882323	0.899193	0.857445	1.04615	1.13527	1.03828	1.07323	1.25166	0.00925377
Q3B8R6	Alpha-2-glycoprotein 1, zinc OS=Rattus norvegicus GN=Azgp1 PE=1 SV=1 - [Q3B8R6_RAT]	18.24	4	4	6	296	34.012	6.23975	0.881749	1.01436	0.876802	0.924303	1.11524	1.15794	1.1542	1.14246	1.23603	0.00977452
Q6RY99	Tetraspanin OS=Rattus norvegicus GN=Tspan17 PE=2 SV=1 - [Q6RY99_RAT]	1.37	1	1	1	512	56.1101	8.60205	0.849294	0.790035	0.88215	0.840493	1.04042	1.03497	0.957767	1.01105	1.20293	0.0108514
B0BNF8	HIV-1 tat interactive protein 2, homolog (Human) OS=Rattus norvegicus GN=Htatip2 PE=2 SV=1 - [B0BNF8_RAT]	11.16	2	2	2	242	26.8389	8.11865	0.752419	0.720592	0.834448	0.769153	1.16674	1.19849	0.967473	1.1109	1.44432	0.0128532
A1XF83	UDP-glucuronosyltransferase OS=Rattus norvegicus GN=Ugt2b PE=2 SV=1 - [A1XF83_RAT]	38.3	2	18	210	530	60.9455	8.49951	0.895295	0.915341	0.83494	0.881859	1.13824	1.03658	1.01765	1.06416	1.20672	0.0149663
A0A0G2K9M5	TBC1 domain family member 8B OS=Rattus norvegicus GN=Tbc1d8b PE=1 SV=1 - [A0A0G2K9M5_RAT]	1.61	1	2	4	1118	128.024	5.63037	0.483877	0.715945	0.622398	0.607407	0.91304	1.01846	0.872471	0.934658	1.53877	0.0151129
Q66H39	ATP-binding cassette sub-family F member 3 OS=Rattus norvegicus GN=Abcf3 PE=2 SV=1 - [ABCF3_RAT]	2.12	1	1	1	709	79.8063	6.46826	0.775232	0.774204	0.73278	0.760739	1.00968	0.867539	1.01132	0.962844	1.26567	0.0152299
A0A0G2K9Y7	Carboxylic ester hydrolase OS=Rattus norvegicus GN=LOC501233 PE=1 SV=1 - [A0A0G2K9Y7_RAT]	34.74	1	16	91	544	59.8034	5.69385	0.976873	0.748534	0.827419	0.850942	1.11805	1.10387	1.14715	1.12302	1.31974	0.0162392
M0RDW3	Probable N-acetyltransferase CML2-like OS=Rattus norvegicus GN=LOC102556148 PE=1 SV=1 - [M0RDW3_RAT]	12.39	1	4	5	226	25.6484	9.74463	0.916865	0.888035	0.726468	0.843789	1.13109	1.08141	1.0481	1.08687	1.28808	0.0191025
D3ZPY2	3 beta-hydroxysteroid dehydrogenase type 7 OS=Rattus norvegicus GN=Hsd3b7 PE=1 SV=2 - [D3ZPY2_RAT]	11.54	3	3	10	338	37.7265	7.62061	0.776372	0.910419	0.960887	0.88256	1.05586	1.07564	1.08862	1.07337	1.2162	0.026902
Q3MID6	Calumenin OS=Rattus norvegicus GN=Calu PE=1 SV=1 - [Q3MID6_RAT]	49.21	1	14	62	315	37.1244	4.60205	0.902388	0.838389	0.86243	0.867736	1.10867	0.948562	1.1392	1.06548	1.22788	0.0332264
Q6XLI7	Copine-1-like OS=Rattus norvegicus GN=Rbm12 PE=1 SV=1 - [Q6XLI7_RAT]	0.97	1	1	1	1032	106.194	8.32373	0.785376	0.802949	0.953876	0.8474	0.982975	1.05735	1.05834	1.03289	1.21889	0.0347471
B2RZ94	RGD1563239 protein OS=Rattus norvegicus GN=Zfp566 PE=2 SV=1 - [B2RZ94_RAT]	3.63	1	1	1	386	45.1068	8.23584		1.01866	1.01715	1.0179		1.6115	1.40325	1.50737	1.48087	0.0423963
A0A0G2K888	Exocyst complex component 2 OS=Rattus norvegicus GN=Exoc2 PE=1 SV=1 - [A0A0G2K888_RAT]	1.77	2	2	2	905	101.861	7.07861	0.806308	0.876291	0.659102	0.780567	1.11863	0.975264	1.34677	1.14689	1.4693	0.0434823
D3ZX06	GH3 domain-containing OS=Rattus norvegicus GN=Ghdc PE=1 SV=1 - [D3ZX06_RAT]	1.33	1	1	1	527	57.8303	7.35693	0.878434	0.773129	0.838625	0.830063	0.930669	1.14893	1.01772	1.03244	1.24381	0.0453889
Q5U1W1	Apolipoprotein L, 3 OS=Rattus norvegicus GN=Apol3 PE=2 SV=1 - [Q5U1W1_RAT]	2.68	1	1	1	336	36.9511	9.5542	0.614575		0.934304	0.774439	1.14687	1.45599	1.47254	1.35847	1.75413	0.0485758
P21775	3-ketoacyl-CoA thiolase A, peroxisomal OS=Rattus norvegicus GN=Acaa1a PE=1 SV=2 - [THIKA_RAT]	59.67	2	18	136	424	43.8057	8.22119	0.921081	0.846382	0.893447	0.88697	1.05856	0.999847	1.24459	1.101	1.24131	0.0496999
A2VCW9	Alpha-aminoadipic semialdehyde synthase, mitochondrial OS=Rattus norvegicus GN=Aass PE=2 SV=1 - [AASS_RAT]	30.67	27	27	141	926	102.842	6.91748	1.16884	1.17271	1.18712	1.17622	0.945664	0.929002	0.926326	0.933664	0.793782	7.84759e-06
Q9Z2Z8	7-dehydrocholesterol reductase OS=Rattus norvegicus GN=Dhcr7 PE=2 SV=1 - [DHCR7_RAT]	19.11	8	8	21	471	54.1194	8.35303	1.29496	1.27432	1.32931	1.29953	0.887017	0.91134	0.896521	0.898293	0.691245	2.15802e-05
P17425	Hydroxymethylglutaryl-CoA synthase, cytoplasmic OS=Rattus norvegicus GN=Hmgcs1 PE=1 SV=1 - [HMCS1_RAT]	16.73	7	8	243	520	57.3974	5.88428	1.35408	1.32303	1.39087	1.35599	0.88365	0.853183	0.858434	0.865089	0.637975	2.28098e-05
P22734	Catechol O-methyltransferase OS=Rattus norvegicus GN=Comt PE=1 SV=2 - [COMT_RAT]	59.09	14	14	166	264	29.5783	5.65576	1.2315	1.22579	1.18874	1.21534	0.907913	0.891997	0.907046	0.902319	0.74244	2.62241e-05
Q499N5	Acyl-CoA synthetase family member 2, mitochondrial OS=Rattus norvegicus GN=Acsf2 PE=2 SV=1 - [ACSF2_RAT]	20.98	11	11	15	615	67.8429	8.11865	1.40526	1.34663	1.33225	1.36138	0.826395	0.851247	0.820038	0.83256	0.611556	2.62666e-05
Q5BK21	Transmembrane 7 superfamily member 2 OS=Rattus norvegicus GN=Tm7sf2 PE=1 SV=1 - [Q5BK21_RAT]	5.26	3	3	3	418	46.4147	8.646	1.4656	1.51362	1.56339	1.5142	0.796565	0.823311	0.747772	0.789216	0.521209	3.53412e-05
A1L1L2	Transmembrane protein 214 OS=Rattus norvegicus GN=Tmem214 PE=2 SV=1 - [TM214_RAT]	9.93	6	6	8	685	76.5168	9.02686	1.11991	1.12931	1.11996	1.12306	0.930878	0.944098	0.911803	0.928926	0.827138	3.95706e-05
Q6AYQ2	Aldo-keto reductase family 1 member C21 OS=Rattus norvegicus GN=Akr1c21 PE=2 SV=1 - [AK1CL_RAT]	31.13	6	10	54	318	36.1115	7.47412	1.32665	1.28092	1.26296	1.29018	0.891366	0.867472	0.906352	0.888397	0.688585	5.36741e-05
B0BMT9	Sqrdl protein OS=Rattus norvegicus GN=Sqrdl PE=1 SV=1 - [B0BMT9_RAT]	27.33	10	10	15	450	50.1698	9.0708	1.23033	1.20738	1.18659	1.2081	0.943165	0.940048	0.916693	0.933302	0.772536	5.4215e-05
G3V9U0	Acyl-CoA synthetase short-chain family member 2 OS=Rattus norvegicus GN=Acss2 PE=1 SV=1 - [G3V9U0_RAT]	5.71	4	4	4	701	78.8373	6.63916	1.29214	1.30513	1.24066	1.27931	0.901712	0.915578	0.884324	0.900538	0.703925	6.28225e-05
P85968	6-phosphogluconate dehydrogenase, decarboxylating OS=Rattus norvegicus GN=Pgd PE=1 SV=1 - [6PGD_RAT]	41.61	18	19	89	483	53.202	7.02002	1.2867	1.23231	1.22161	1.24687	0.888722	0.909328	0.88139	0.893147	0.716309	8.47081e-05
Q5M875	17-beta-hydroxysteroid dehydrogenase 13 OS=Rattus norvegicus GN=Hsd17b13 PE=1 SV=1 - [DHB13_RAT]	45.67	10	12	54	300	33.4732	9.37842	1.14612	1.14457	1.1299	1.1402	0.930847	0.952649	0.910605	0.931367	0.816848	9.30903e-05
Q62967	Diphosphomevalonate decarboxylase OS=Rattus norvegicus GN=Mvd PE=1 SV=1 - [MVD1_RAT]	2.24	1	1	1	401	43.8755	7.07861	1.48224	1.41501	1.54227	1.47984	0.784295	0.849275	0.770151	0.80124	0.541438	0.000104039
G3V6I4	Mitochondrial amidoxime reducing component 1 OS=Rattus norvegicus GN=Marc1 PE=1 SV=1 - [G3V6I4_RAT]	51.92	11	13	71	339	37.7664	8.41162	1.20821	1.15576	1.20967	1.19121	0.867677	0.902155	0.88228	0.884037	0.742131	0.000112305
P50554	4-aminobutyrate aminotransferase, mitochondrial OS=Rattus norvegicus GN=Abat PE=1 SV=3 - [GABT_RAT]	52.4	20	21	119	500	56.4194	7.92822	1.13337	1.16142	1.12152	1.13877	0.944169	0.917413	0.929772	0.930451	0.817067	0.000123338
A0A0G2K5E7	ATP-citrate synthase OS=Rattus norvegicus GN=Acly PE=1 SV=1 - [A0A0G2K5E7_RAT]	38.91	39	39	144	1100	120.466	7.34229	1.36883	1.45369	1.32663	1.38305	0.844794	0.832291	0.782714	0.819933	0.592843	0.000177244
M0R5W4	Mevalonate kinase OS=Rattus norvegicus GN=Mvk PE=1 SV=1 - [M0R5W4_RAT]	3.04	1	1	1	395	41.7324	5.50342	1.30767	1.30877	1.38957	1.33534	0.848289	0.919993	0.868606	0.878963	0.658233	0.000188818
F1LND7	Farnesyl pyrophosphate synthase OS=Rattus norvegicus GN=Fdps PE=1 SV=3 - [F1LND7_RAT]	31.16	10	10	26	353	40.7779	5.52881	1.68515	1.51563	1.71435	1.63837	0.744939	0.776542	0.671663	0.731048	0.446203	0.000196497
D4A605	Nicotinamide N-methyltransferase OS=Rattus norvegicus GN=Nnmt PE=1 SV=1 - [D4A605_RAT]	19.7	6	6	14	264	29.4968	5.18604	1.18371	1.13376	1.14177	1.15308	0.886682	0.925467	0.907364	0.906505	0.786162	0.000208347
Q5I0N5	Agxt protein (Fragment) OS=Rattus norvegicus GN=Agxt PE=2 SV=1 - [Q5I0N5_RAT]	26.65	9	9	15	394	43.6419	8.33838	1.20229	1.24958	1.18495	1.21227	0.901924	0.846594	0.90418	0.884233	0.729401	0.000262406
P09034	Argininosuccinate synthase OS=Rattus norvegicus GN=Ass1 PE=1 SV=1 - [ASSY_RAT]	72.82	26	26	484	412	46.4669	7.78174	1.23486	1.25893	1.16712	1.2203	0.892305	0.869936	0.878459	0.880233	0.721324	0.000272874
P55053	Fatty acid-binding protein, epidermal OS=Rattus norvegicus GN=Fabp5 PE=1 SV=3 - [FABP5_RAT]	23.7	3	3	7	135	15.0495	7.18115	1.30517	1.29496	1.32526	1.30846	0.883339	0.926089	0.796764	0.868731	0.663932	0.000354964
D4A904	N-acetylglutamate synthase OS=Rattus norvegicus GN=Nags PE=1 SV=1 - [D4A904_RAT]	13.47	8	8	12	527	57.3846	8.89502	1.26296	1.16604	1.20552	1.21151	0.893266	0.901308	0.885357	0.89331	0.737355	0.000366952
P02692	Fatty acid-binding protein, liver OS=Rattus norvegicus GN=Fabp1 PE=1 SV=1 - [FABPL_RAT]	77.95	9	9	1063	127	14.2633	8.07471	1.17804	1.158	1.23496	1.19034	0.931522	0.932775	0.952657	0.938985	0.78884	0.00047328
P13221	Aspartate aminotransferase, cytoplasmic OS=Rattus norvegicus GN=Got1 PE=1 SV=3 - [AATC_RAT]	59.32	22	22	86	413	46.3995	7.21045	1.40198	1.27705	1.25809	1.31238	0.854622	0.866464	0.86687	0.862652	0.657321	0.000578741
O35760	Isopentenyl-diphosphate Delta-isomerase 1 OS=Rattus norvegicus GN=Idi1 PE=2 SV=2 - [IDI1_RAT]	3.08	1	1	1	227	26.3793	5.8335	1.58951	1.47661	1.72902	1.59838	0.794994	0.824228	0.683324	0.767515	0.480183	0.00060506
A0A0G2K5L6	Acetyl-CoA carboxylase beta OS=Rattus norvegicus GN=Acacb PE=1 SV=1 - [A0A0G2K5L6_RAT]	4.57	5	9	11	2452	275.582	6.30322	1.39459	1.2877	1.43669	1.37299	0.850253	0.911281	0.794545	0.852026	0.620561	0.000727809
P07379	Phosphoenolpyruvate carboxykinase, cytosolic [GTP] OS=Rattus norvegicus GN=Pck1 PE=1 SV=1 - [PCKGC_RAT]	60.29	29	29	196	622	69.371	6.49365	1.19169	1.13085	1.17867	1.16707	0.93893	0.960446	0.981018	0.960131	0.822685	0.000728563
H2BF30	Fatty acid desaturase 1 OS=Rattus norvegicus GN=Fads1 PE=2 SV=1 - [H2BF30_RAT]	1.57	1	1	1	447	52.4469	9.29053	1.64942	1.395	1.51877	1.52106	0.845165	0.805836	0.728674	0.793225	0.521495	0.000850261
O88989	Malate dehydrogenase, cytoplasmic OS=Rattus norvegicus GN=Mdh1 PE=1 SV=3 - [MDHC_RAT]	50.9	21	21	133	334	36.46	6.58057	1.12209	1.17476	1.10076	1.13254	0.939476	0.920852	0.918385	0.926238	0.817844	0.000851484
A1KXK4	3-beta-hydroxysterol delta 24 reductase OS=Rattus norvegicus GN=Dhcr24 PE=2 SV=1 - [A1KXK4_RAT]	10.27	6	6	15	516	60.0059	7.94287	1.20908	1.12599	1.16407	1.16638	0.9255	0.949776	0.903188	0.926154	0.79404	0.000949308
P11497	Acetyl-CoA carboxylase 1 OS=Rattus norvegicus GN=Acaca PE=1 SV=1 - [ACACA_RAT]	13.3	25	30	44	2345	265.025	6.39209	1.29531	1.36813	1.20433	1.28926	0.891459	0.848492	0.839298	0.859749	0.666857	0.00101154
D3ZKT9	Hypothetical protein LOC691311 OS=Rattus norvegicus GN=LOC691311 PE=4 SV=2 - [D3ZKT9_RAT]	2.9	1	1	1	207	23.5032	4.71631	1.32002	1.36126	1.31064	1.33064	0.96423	0.792872	0.896135	0.884412	0.664653	0.00102668
F1LZ05	Poly [ADP-ribose] polymerase OS=Rattus norvegicus GN=Parp14 PE=1 SV=2 - [F1LZ05_RAT]	1.96	4	4	5	1787	199.405	6.88818	1.09384	1.14011	1.12762	1.12052	0.952407	0.898581	0.884603	0.911864	0.813784	0.00110332
P11030	Acyl-CoA-binding protein OS=Rattus norvegicus GN=Dbi PE=1 SV=3 - [ACBP_RAT]	62.07	6	6	126	87	10.0212	8.82178	1.29098	1.20975	1.37318	1.29131	0.909975	0.871405	0.877192	0.886191	0.686275	0.00113923
A0A0S2EF23	Glutaminase variant 2 OS=Rattus norvegicus PE=2 SV=1 - [A0A0S2EF23_RAT]	39.96	19	19	71	543	60.1252	8.00146	1.21521	1.20471	1.11608	1.17867	0.932591	0.920094	0.901467	0.918051	0.778889	0.00134493
M0R7U2	RCG20339, isoform CRA_b OS=Rattus norvegicus GN=Tstd1 PE=1 SV=1 - [M0R7U2_RAT]	5.26	1	1	1	133	14.4033	8.48486	1.19343	1.28497	1.21571	1.23137	0.976173	0.905528	0.886701	0.922801	0.749409	0.00134697
P12785	Fatty acid synthase OS=Rattus norvegicus GN=Fasn PE=1 SV=3 - [FAS_RAT]	28.54	60	61	174	2505	272.478	6.39209	1.52488	1.78515	1.44302	1.58435	0.78405	0.750251	0.713995	0.749432	0.473021	0.00136012
F1LMG2	S-methylmethionine--homocysteine S-methyltransferase BHMT2 OS=Rattus norvegicus GN=Bhmt2 PE=1 SV=3 - [F1LMG2_RAT]	50.14	9	13	230	361	39.691	6.60986	1.23182	1.26015	1.14574	1.21257	0.9379	0.939624	0.895082	0.924202	0.762185	0.00151631
Q02769	Squalene synthase OS=Rattus norvegicus GN=Fdft1 PE=2 SV=1 - [FDFT_RAT]	4.33	2	2	3	416	48.0753	7.04932	1.73926	1.44387	1.75953	1.64755	0.706103	0.846603	0.624549	0.725752	0.440503	0.00158773
P43165	Carbonic anhydrase 5A, mitochondrial OS=Rattus norvegicus GN=Ca5a PE=1 SV=1 - [CAH5A_RAT]	5.92	2	2	2	304	34.4771	8.26514	1.20325	1.2807	1.14847	1.21081	0.839892	0.908812	0.907266	0.885323	0.731184	0.0018714
Q64654	Lanosterol 14-alpha demethylase OS=Rattus norvegicus GN=Cyp51a1 PE=1 SV=1 - [CP51A_RAT]	9.94	5	5	6	503	56.6704	8.52881	1.53076	1.43604	1.79248	1.58643	0.826547	0.769801	0.702329	0.766225	0.482988	0.00188013
A0A0G2JSM2	60 kDa lysophospholipase OS=Rattus norvegicus GN=Aspg PE=1 SV=1 - [A0A0G2JSM2_RAT]	18.09	7	7	13	564	60.7561	5.77002	1.13453	1.21178	1.11371	1.15334	0.922919	0.875933	0.928519	0.909124	0.788252	0.00202867
Q5XI22	Acetyl-CoA acetyltransferase, cytosolic OS=Rattus norvegicus GN=Acat2 PE=1 SV=1 - [THIC_RAT]	5.54	3	3	4	397	41.0821	7.29834	1.34544	1.29224	1.53495	1.39088	0.854351	0.866532	0.787496	0.836126	0.601151	0.00203008
Q9EQ25	Sodium-coupled neutral amino acid transporter 4 OS=Rattus norvegicus GN=Slc38a4 PE=1 SV=1 - [S38A4_RAT]	4.2	3	3	4	547	60.5733	6.58057	1.20152	1.16936	1.25552	1.2088	0.903092	0.986037	0.973432	0.954187	0.789367	0.00211416
P05370	Glucose-6-phosphate 1-dehydrogenase OS=Rattus norvegicus GN=G6pdx PE=1 SV=3 - [G6PD_RAT]	8.54	5	5	6	515	59.3378	6.37939	1.11652	1.13178	1.11351	1.1206	0.874112	0.969535	0.926164	0.92327	0.823904	0.00218274
D4ABM1	Cytochrome P450 2C7 OS=Rattus norvegicus GN=Cyp2c7 PE=1 SV=2 - [D4ABM1_RAT]	36.73	15	19	102	490	56.1527	8.52881	1.14613	1.09061	1.19646	1.1444	0.939146	0.942153	0.925142	0.93548	0.817442	0.00253144
G3V8D4	Apolipoprotein C-II (Predicted) OS=Rattus norvegicus GN=Apoc2 PE=1 SV=1 - [G3V8D4_RAT]	18.56	2	2	9	97	10.6883	4.61475	1.15569	1.27944	1.17534	1.20349	0.930673	0.834018	0.88737	0.88402	0.734548	0.00254393
Q5I0K3	Citrate lyase subunit beta-like protein, mitochondrial OS=Rattus norvegicus GN=Clybl PE=2 SV=2 - [CLYBL_RAT]	18.34	5	5	9	338	37.2976	7.97217	1.08673	1.14888	1.18262	1.13941	0.887124	0.946297	0.92793	0.92045	0.807831	0.00270151
A0A0G2JYC0	Sulfotransferase OS=Rattus norvegicus GN=Sult2a1 PE=1 SV=1 - [A0A0G2JYC0_RAT]	36.97	4	14	49	284	33.1129	8.39697	1.62948	1.29599	1.56856	1.49801	0.837363	0.820867	0.730585	0.796272	0.531553	0.00287098
A0A0G2K6R1	NIMA-related kinase 3 OS=Rattus norvegicus GN=Nek3 PE=1 SV=1 - [A0A0G2K6R1_RAT]	1.76	1	1	1	512	57.5104	8.19189	1.20845	1.15269	1.09027	1.15047	0.936222	0.907996	0.880526	0.908248	0.789459	0.0030258
P56627	Aquaporin-9 OS=Rattus norvegicus GN=Aqp9 PE=2 SV=1 - [AQP9_RAT]	3.39	1	1	3	295	31.8495	7.37158	1.38328	1.18632	1.36709	1.31223	0.924647	0.899769	0.897812	0.907409	0.691501	0.00314455
M0RB46	PHD finger protein 11B OS=Rattus norvegicus GN=Phf11b PE=4 SV=2 - [M0RB46_RAT]	2.49	1	1	1	281	31.3374	6.88818	1.3422	1.27796	1.21425	1.27814	1.00412	0.855664	0.874394	0.911392	0.713062	0.00352208
Q4KLZ6	Triokinase/FMN cyclase OS=Rattus norvegicus GN=Tkfc PE=1 SV=1 - [TKFC_RAT]	64.36	27	27	266	578	59.4063	7.51807	1.1538	1.21778	1.08981	1.1538	0.938634	0.908673	0.904317	0.917208	0.794948	0.00355149
P04638	Apolipoprotein A-II OS=Rattus norvegicus GN=Apoa2 PE=2 SV=1 - [APOA2_RAT]	19.61	2	2	11	102	11.4319	6.65381	1.12749	1.26986	1.16565	1.18767	0.930489	0.937414	0.912172	0.926691	0.780261	0.00378972
P47875	Cysteine and glycine-rich protein 1 OS=Rattus norvegicus GN=Csrp1 PE=1 SV=2 - [CSRP1_RAT]	25.91	6	6	6	193	20.5998	8.57275	1.11583	1.22128	1.21164	1.18292	0.876704	0.974589	0.874519	0.908604	0.768105	0.00434059
P21213	Histidine ammonia-lyase OS=Rattus norvegicus GN=Hal PE=1 SV=1 - [HUTH_RAT]	46.58	27	27	87	657	72.2385	6.50732	1.26349	1.37546	1.14501	1.26132	0.882773	0.897684	0.864939	0.881799	0.699108	0.00484255
Q5RKL4	Dimethylglycine dehydrogenase OS=Rattus norvegicus GN=Dmgdh PE=1 SV=1 - [Q5RKL4_RAT]	50.64	1	34	298	857	95.9174	7.23975	1.1518	1.27894	1.13476	1.1885	0.937388	0.935834	0.926642	0.933288	0.785266	0.00500801
A0A1B0GWV4	Translocase of outer mitochondrial membrane 5 OS=Rattus norvegicus GN=Tomm5 PE=1 SV=1 - [A0A1B0GWV4_RAT]	31.91	2	2	6	47	5.43488	8.19189	1.17087	1.15945	1.05399	1.1281	0.91197	0.919087	0.925759	0.918939	0.814588	0.00502337
P24008	3-oxo-5-alpha-steroid 4-dehydrogenase 1 OS=Rattus norvegicus GN=Srd5a1 PE=1 SV=2 - [S5A1_RAT]	9.27	3	3	4	259	29.7606	8.85107	1.46439	1.72142	1.30255	1.49612	0.70937	0.856363	0.792429	0.786054	0.525394	0.00533729
D4A5Q9	Glycine decarboxylase OS=Rattus norvegicus GN=Gldc PE=1 SV=1 - [D4A5Q9_RAT]	33.03	3	24	66	884	98.4855	6.63916	1.16765	1.36648	1.14432	1.22615	0.860311	0.78106	0.824243	0.821871	0.670287	0.0054899
Q5RKL5	Metalloreductase STEAP3 OS=Rattus norvegicus GN=Steap3 PE=1 SV=1 - [STEA3_RAT]	5.74	3	3	3	488	54.6388	9.21729	1.09406	1.19918	1.15468	1.14931	0.931653	0.985364	0.894447	0.937155	0.815406	0.00623853
A0A0G2JSK9	Betaine--homocysteine S-methyltransferase 1 OS=Rattus norvegicus GN=Bhmt PE=1 SV=1 - [A0A0G2JSK9_RAT]	69.78	20	24	811	407	44.9648	7.89893	1.31287	1.50937	1.20294	1.34173	0.893337	0.859458	0.873853	0.875549	0.652555	0.00665004
D3Z9A4	GON7, KEOPS complex subunit homolog OS=Rattus norvegicus GN=Gon7 PE=1 SV=2 - [D3Z9A4_RAT]	9.28	1	1	1	97	10.2106	4.04346	1.06808	1.17736	1.1468	1.13075	0.926243	0.819489	0.918137	0.887956	0.785281	0.0068226
F1LMK6	L-serine dehydratase/L-threonine deaminase OS=Rattus norvegicus GN=Sds PE=1 SV=2 - [F1LMK6_RAT]	36.19	11	11	27	362	38.2521	7.47412	1.22797	1.26743	1.10733	1.20091	0.933083	0.974002	0.926702	0.944596	0.786567	0.00704588
A0A0G2JVS4	Arf-GAP with GTPase, ANK repeat and PH domain-containing protein 2 OS=Rattus norvegicus GN=Agap2 PE=4 SV=1 - [A0A0G2JVS4_RAT]	1.06	1	1	1	753	77.4916	10.4771	1.15428	1.10419	1.13699	1.13182	0.998703	0.887531	0.877674	0.921302	0.814	0.00711178
P09811	Glycogen phosphorylase, liver form OS=Rattus norvegicus GN=Pygl PE=1 SV=5 - [PYGL_RAT]	63.06	41	50	559	850	97.421	7.1958	1.11295	1.20946	1.08039	1.13426	0.949201	0.948794	0.935459	0.944485	0.832684	0.00825288
Q9JHX0	Regulator of G-protein signaling 2 OS=Rattus norvegicus GN=Rgs2 PE=2 SV=1 - [RGS2_RAT]	3.32	1	1	1	211	24.3073	8.77783	1.33775	1.32316	1.1256	1.26217	0.786584	0.947888	0.841352	0.858608	0.680263	0.00833832
M5AK03	Zinc finger and BTB domain containing 16 protein (Fragment) OS=Rattus norvegicus GN=Zbtb16 PE=2 SV=1 - [M5AK03_RAT]	3.83	1	1	2	235	26.0255	7.73779	1.13806	1.16082	1.14603	1.1483	0.882755	1.02391	0.90513	0.937264	0.816217	0.00888322
D3ZLH3	Uncharacterized protein OS=Rattus norvegicus PE=4 SV=1 - [D3ZLH3_RAT]	38.75	1	8	19	160	18.7543	10.5796	1.19279	1.32198	1.26126	1.25868	0.72577	0.981196	0.713827	0.806931	0.641095	0.00888742
A0A0G2KAL9	Mitochondrial fission factor OS=Rattus norvegicus GN=Mff PE=1 SV=1 - [A0A0G2KAL9_RAT]	5.5	1	1	2	291	32.781	7.44482	1.09327	0.994593	1.12519	1.07102	0.896719	0.842892	0.80632	0.848644	0.792372	0.00927744
B1WBN9	Pyruvate kinase OS=Rattus norvegicus GN=Pklr PE=2 SV=1 - [B1WBN9_RAT]	60.04	26	28	241	543	58.7567	6.62451	1.13926	1.20971	1.06487	1.13794	0.954504	0.931261	0.90637	0.930712	0.817889	0.00928904
Q63342	Dimethylglycine dehydrogenase, mitochondrial OS=Rattus norvegicus GN=Dmgdh PE=1 SV=1 - [M2GD_RAT]	54.14	4	37	295	857	95.9875	7.37158	1.18352	1.34412	1.13376	1.22047	0.944282	0.904456	0.894711	0.914483	0.74929	0.00938737
Q3SWT0	Platelet endothelial cell adhesion molecule OS=Rattus norvegicus GN=Pecam1 PE=1 SV=1 - [PECA1_RAT]	2.95	2	2	2	678	76.1409	6.75635	1.33592	1.19101	1.11913	1.21535	0.889112	0.952505	0.925854	0.92249	0.759032	0.0115662
B5D5N9	Cationic amino acid transporter 2 OS=Rattus norvegicus GN=Slc7a2 PE=1 SV=1 - [CTR2_RAT]	5.78	3	3	6	657	71.647	6.82959	1.14799	1.28188	1.34259	1.25748	0.998439	0.981482	0.867836	0.949252	0.754882	0.0120122
D3ZF21	GPRIN family member 3 OS=Rattus norvegicus GN=Gprin3 PE=1 SV=2 - [D3ZF21_RAT]	1.57	1	1	1	762	81.2846	6.59521	1.08883	1.09043	1.16146	1.11357	0.935606	0.959712	0.820687	0.905335	0.812999	0.0132746
F1M4U9	Bromodomain adjacent to zinc finger domain, 1A OS=Rattus norvegicus GN=Baz1a PE=1 SV=2 - [F1M4U9_RAT]	0.46	1	1	4	1521	174.11	6.50732	1.16257	1.23403	1.10374	1.16678	0.975289	0.985934	0.863015	0.941413	0.806847	0.0143903
D3ZLC3	Sperm specific antigen 2 (Predicted) OS=Rattus norvegicus GN=Ssfa2 PE=1 SV=1 - [D3ZLC3_RAT]	0.96	1	1	1	1255	137.106	5.22412	1.21891	1.16024	1.01908	1.13274	0.874782	0.882736	0.901653	0.88639	0.782517	0.014645
A0A0G2KAD5	Rab proteins geranylgeranyltransferase component A 1 OS=Rattus norvegicus GN=Chm PE=1 SV=1 - [A0A0G2KAD5_RAT]	2.13	1	1	1	611	68.4153	4.85596	1.01277	1.12683	1.16343	1.10101	0.904648	0.927967	0.913249	0.915288	0.831317	0.0154993
B2GUX6	RGD1312005 protein OS=Rattus norvegicus GN=RGD1312005 PE=2 SV=1 - [B2GUX6_RAT]	3.7	1	1	3	189	21.237	9.39307	1.201	1.16077	1.1231	1.16162	0.911386	0.990699	0.76612	0.889402	0.765653	0.0172899
Q5PQN2	Bifunctional apoptosis regulator OS=Rattus norvegicus GN=Bfar PE=2 SV=1 - [BFAR_RAT]	1.33	1	1	1	450	52.99	6.88818	1.10564		1.12494	1.11529	0.715486	0.835953	0.897885	0.816441	0.732044	0.0231457
A0A0G2K2D5	MTSS1, I-BAR domain-containing OS=Rattus norvegicus GN=Mtss1 PE=1 SV=1 - [A0A0G2K2D5_RAT]	0.97	1	1	1	719	78.4061	7.32764	1.37141	1.1369	1.22037	1.24289	1.02238	0.901568	0.977227	0.967059	0.778071	0.023263
A0A0A1FZ38	NADH-ubiquinone oxidoreductase chain 3 OS=Rattus norvegicus GN=ND3 PE=3 SV=1 - [A0A0A1FZ38_RAT]	18.26	2	2	9	115	13.0619	4.43701	1.23915	1.0717	1.10758	1.13947	0.915004	0.974478	0.953712	0.947731	0.831728	0.023507
F1LQS0	N-myc (and STAT) interactor OS=Rattus norvegicus GN=Nmi PE=1 SV=1 - [F1LQS0_RAT]	7.44	1	1	2	215	24.5956	6.94678	1.32666	1.08899	1.21121	1.20895	0.915575	1.00296	0.874974	0.93117	0.770227	0.0238676
P02454	Collagen alpha-1(I) chain OS=Rattus norvegicus GN=Col1a1 PE=1 SV=5 - [CO1A1_RAT]	9.29	12	12	52	1453	137.869	5.92236	1.1219	0.981563	1.20622	1.10323	0.842493	0.911423	0.818187	0.857367	0.777145	0.0260077
A0A0G2JYT9	Regulatory factor X3 OS=Rattus norvegicus GN=Rfx3 PE=1 SV=1 - [A0A0G2JYT9_RAT]	0.77	1	1	1	780	87.2979	5.77002	1.13477	1.0569	1.106	1.09922	0.763374	0.983681	0.854272	0.867109	0.788837	0.0267451
Q6AYG5	Ethylmalonyl-CoA decarboxylase OS=Rattus norvegicus GN=Echdc1 PE=1 SV=1 - [ECHD1_RAT]	6.69	2	2	3	299	32.61	7.03467	1.2428	1.19472	1.06125	1.16626	0.9428	1.0115	0.892391	0.948899	0.813628	0.0278424
A0A0G2K0P2	Mothers against decapentaplegic homolog OS=Rattus norvegicus GN=Smad2 PE=1 SV=1 - [A0A0G2K0P2_RAT]	2.68	1	1	1	411	46.2613	5.73193	1.35363	1.08597	1.30014	1.24658	1.01712	0.831775	0.760584	0.869826	0.697768	0.0281654
A0A0A0MXT5	Ribosomal oxygenase 2 OS=Rattus norvegicus GN=Riox2 PE=1 SV=2 - [A0A0A0MXT5_RAT]	1.3	1	1	1	463	52.856	7.25439	1.0967	1.26807	1.06623	1.14367	0.860945	0.973245	0.872524	0.902238	0.7889	0.0287781
A0A0G2K0W4	Leukocyte receptor cluster member 8 OS=Rattus norvegicus GN=Leng8 PE=1 SV=1 - [A0A0G2K0W4_RAT]	1.22	1	1	1	818	90.2309	9.0708	1.35557	1.04271	1.11628	1.17152	0.811313	0.902346	0.814606	0.842755	0.719369	0.0293875
D4A7W1	Abhydrolase domain containing 2 (Predicted) OS=Rattus norvegicus GN=Abhd2 PE=1 SV=1 - [D4A7W1_RAT]	2.35	1	1	1	425	48.304	6.69775	1.28097	1.07839	1.06776	1.14237	0.86592	0.923532	0.95203	0.913828	0.799937	0.0364008
D4A2N1	Arginyl-tRNA--protein transferase 1 OS=Rattus norvegicus GN=Ate1 PE=1 SV=1 - [D4A2N1_RAT]	2.36	1	1	1	509	58.1788	8.1626	1.23315	1.07504	1.18364	1.16394	1.05382	0.919162	0.897094	0.956692	0.821941	0.0375616
P61212	ADP-ribosylation factor-like protein 1 OS=Rattus norvegicus GN=Arl1 PE=1 SV=1 - [ARL1_RAT]	13.26	2	2	2	181	20.3985	5.71924	1.1599	1.09661	1.05682	1.10445	0.628751	0.937728	0.863686	0.810055	0.73345	0.0396107
G3V702	Smu-1 suppressor of mec-8 and unc-52 homolog (C. elegans) OS=Rattus norvegicus GN=Smu1 PE=1 SV=1 - [G3V702_RAT]	5.07	3	3	4	513	57.5072	7.18115	1.08589	1.17038	1.09496	1.11708	0.731161	0.96895	0.94552	0.881877	0.789451	0.0427958
P28572	Sodium- and chloride-dependent glycine transporter 1 OS=Rattus norvegicus GN=Slc6a9 PE=1 SV=2 - [SC6A9_RAT]	1.88	1	1	1	638	71.0141	7.50342	1.26972	1.0139	1.18422	1.15595	0.900592	0.956243	0.945293	0.934043	0.808033	0.0450876

## Sheet: S2
Peptide Sequence	Protein Name	Replicate Name	Precursor Mz	Precursor Charge	Product Mz	Product Charge	Fragment Ion	Retention Time	Area
TGPNLHGLFGR	D4A5L9	N1	584.815	2	913.5	1	y8	56.06	32144910
TGPNLHGLFGR	D4A5L9	N2	584.815	2	913.5	1	y8	56.16	33731152
TGPNLHGLFGR	D4A5L9	N3	584.815	2	913.5	1	y8	56.54	34951044
TGPNLHGLFGR	D4A5L9	M1	584.815	2	913.5	1	y8	56.64	27349628
TGPNLHGLFGR	D4A5L9	M2	584.815	2	913.5	1	y8	56.21	41567588
TGPNLHGLFGR	D4A5L9	M3	584.815	2	913.5	1	y8	56.47	40862796
TGPNLHGLFGR	D4A5L9	A1	584.815	2	913.5	1	y8	56.27	36962176
TGPNLHGLFGR	D4A5L9	A2	584.815	2	913.5	1	y8	56.7	32452036
TGPNLHGLFGR	D4A5L9	A3	584.815	2	913.5	1	y8	56.29	44072316
TGPNLHGLFGR	D4A5L9	N1	584.815	2	799.457	1	y7	56.06	45897096
TGPNLHGLFGR	D4A5L9	N2	584.815	2	799.457	1	y7	56.16	52744448
TGPNLHGLFGR	D4A5L9	N3	584.815	2	799.457	1	y7	56.54	52138272
TGPNLHGLFGR	D4A5L9	M1	584.815	2	799.457	1	y7	56.64	40314652
TGPNLHGLFGR	D4A5L9	M2	584.815	2	799.457	1	y7	56.21	59190784
TGPNLHGLFGR	D4A5L9	M3	584.815	2	799.457	1	y7	56.49	59354560
TGPNLHGLFGR	D4A5L9	A1	584.815	2	799.457	1	y7	56.27	54368996
TGPNLHGLFGR	D4A5L9	A2	584.815	2	799.457	1	y7	56.7	49658816
TGPNLHGLFGR	D4A5L9	A3	584.815	2	799.457	1	y7	56.29	64927192
TGPNLHGLFGR	D4A5L9	N1	584.815	2	686.373	1	y6	56.06	204058096
TGPNLHGLFGR	D4A5L9	N2	584.815	2	686.373	1	y6	56.16	214099664
TGPNLHGLFGR	D4A5L9	N3	584.815	2	686.373	1	y6	56.54	219570128
TGPNLHGLFGR	D4A5L9	M1	584.815	2	686.373	1	y6	56.64	172878400
TGPNLHGLFGR	D4A5L9	M2	584.815	2	686.373	1	y6	56.21	261231824
TGPNLHGLFGR	D4A5L9	M3	584.815	2	686.373	1	y6	56.47	257630192
TGPNLHGLFGR	D4A5L9	A1	584.815	2	686.373	1	y6	56.27	237642544
TGPNLHGLFGR	D4A5L9	A2	584.815	2	686.373	1	y6	56.7	210127184
TGPNLHGLFGR	D4A5L9	A3	584.815	2	686.373	1	y6	56.29	275031104
TGQAAGFSYTDANK	D4A5L9	N1	715.831	2	1073.49	1	y10	37.92	146344656
TGQAAGFSYTDANK	D4A5L9	N2	715.831	2	1073.49	1	y10	38.1	213572944
TGQAAGFSYTDANK	D4A5L9	N3	715.831	2	1073.49	1	y10	39.14	169939360
TGQAAGFSYTDANK	D4A5L9	M1	715.831	2	1073.49	1	y10	39.36	196201760
TGQAAGFSYTDANK	D4A5L9	M2	715.831	2	1073.49	1	y10	38.23	215876912
TGQAAGFSYTDANK	D4A5L9	M3	715.831	2	1073.49	1	y10	38.85	156989600
TGQAAGFSYTDANK	D4A5L9	A1	715.831	2	1073.49	1	y10	38.29	149315840
TGQAAGFSYTDANK	D4A5L9	A2	715.831	2	1073.49	1	y10	39.45	130699616
TGQAAGFSYTDANK	D4A5L9	A3	715.831	2	1073.49	1	y10	38.19	114676656
TGQAAGFSYTDANK	D4A5L9	N1	715.831	2	1002.45	1	y9	37.88	185674288
TGQAAGFSYTDANK	D4A5L9	N2	715.831	2	1002.45	1	y9	38.1	274328992
TGQAAGFSYTDANK	D4A5L9	N3	715.831	2	1002.45	1	y9	39.14	218219328
TGQAAGFSYTDANK	D4A5L9	M1	715.831	2	1002.45	1	y9	39.36	247531008
TGQAAGFSYTDANK	D4A5L9	M2	715.831	2	1002.45	1	y9	38.23	276272480
TGQAAGFSYTDANK	D4A5L9	M3	715.831	2	1002.45	1	y9	38.85	197805264
TGQAAGFSYTDANK	D4A5L9	A1	715.831	2	1002.45	1	y9	38.27	193161872
TGQAAGFSYTDANK	D4A5L9	A2	715.831	2	1002.45	1	y9	39.44	161062064
TGQAAGFSYTDANK	D4A5L9	A3	715.831	2	1002.45	1	y9	38.19	142947568
TGQAAGFSYTDANK	D4A5L9	N1	715.831	2	798.363	1	y7	37.88	105245504
TGQAAGFSYTDANK	D4A5L9	N2	715.831	2	798.363	1	y7	38.15	161735504
TGQAAGFSYTDANK	D4A5L9	N3	715.831	2	798.363	1	y7	39.14	128605048
TGQAAGFSYTDANK	D4A5L9	M1	715.831	2	798.363	1	y7	39.36	140899312
TGQAAGFSYTDANK	D4A5L9	M2	715.831	2	798.363	1	y7	38.23	154646368
TGQAAGFSYTDANK	D4A5L9	M3	715.831	2	798.363	1	y7	38.85	116825832
TGQAAGFSYTDANK	D4A5L9	A1	715.831	2	798.363	1	y7	38.27	112601016
TGQAAGFSYTDANK	D4A5L9	A2	715.831	2	798.363	1	y7	39.45	92863008
TGQAAGFSYTDANK	D4A5L9	A3	715.831	2	798.363	1	y7	38.14	82959384
ADLIAYLK	D4A5L9	N1	453.768	2	720.465	1	y6	58.55	25277180
ADLIAYLK	D4A5L9	N2	453.768	2	720.465	1	y6	58.55	76003832
ADLIAYLK	D4A5L9	N3	453.768	2	720.465	1	y6	58.86	28171568
ADLIAYLK	D4A5L9	M1	453.768	2	720.465	1	y6	58.88	44062144
ADLIAYLK	D4A5L9	M2	453.768	2	720.465	1	y6	58.63	32877412
ADLIAYLK	D4A5L9	M3	453.768	2	720.465	1	y6	58.76	21652006
ADLIAYLK	D4A5L9	A1	453.768	2	720.465	1	y6	58.72	21378518
ADLIAYLK	D4A5L9	A2	453.768	2	720.465	1	y6	59	17902190
ADLIAYLK	D4A5L9	A3	453.768	2	720.465	1	y6	58.68	19088548
ADLIAYLK	D4A5L9	N1	453.768	2	607.381	1	y5	58.55	35702596
ADLIAYLK	D4A5L9	N2	453.768	2	607.381	1	y5	58.55	111117440
ADLIAYLK	D4A5L9	N3	453.768	2	607.381	1	y5	58.86	39531236
ADLIAYLK	D4A5L9	M1	453.768	2	607.381	1	y5	58.88	63666988
ADLIAYLK	D4A5L9	M2	453.768	2	607.381	1	y5	58.63	48326752
ADLIAYLK	D4A5L9	M3	453.768	2	607.381	1	y5	58.76	31257374
ADLIAYLK	D4A5L9	A1	453.768	2	607.381	1	y5	58.72	30648904
ADLIAYLK	D4A5L9	A2	453.768	2	607.381	1	y5	59	24999474
ADLIAYLK	D4A5L9	A3	453.768	2	607.381	1	y5	58.68	26733524
ADLIAYLK	D4A5L9	N1	453.768	2	494.297	1	y4	58.55	51371052
ADLIAYLK	D4A5L9	N2	453.768	2	494.297	1	y4	58.55	164194496
ADLIAYLK	D4A5L9	N3	453.768	2	494.297	1	y4	58.86	56883176
ADLIAYLK	D4A5L9	M1	453.768	2	494.297	1	y4	58.88	93075856
ADLIAYLK	D4A5L9	M2	453.768	2	494.297	1	y4	58.63	71564944
ADLIAYLK	D4A5L9	M3	453.768	2	494.297	1	y4	58.76	46010120
ADLIAYLK	D4A5L9	A1	453.768	2	494.297	1	y4	58.72	44593264
ADLIAYLK	D4A5L9	A2	453.768	2	494.297	1	y4	59	35786036
ADLIAYLK	D4A5L9	A3	453.768	2	494.297	1	y4	58.68	38340728
LFPDAIK	Q5PQN2	N1	402.237	2	446.261	1	y4	56.24	3317652
LFPDAIK	Q5PQN2	N2	402.237	2	446.261	1	y4	56.32	3446044
LFPDAIK	Q5PQN2	N3	402.237	2	446.261	1	y4	56.63	2574694
LFPDAIK	Q5PQN2	M1	402.237	2	446.261	1	y4	56.71	2635873
LFPDAIK	Q5PQN2	M2	402.237	2	446.261	1	y4	56.34	3854005
LFPDAIK	Q5PQN2	M3	402.237	2	446.261	1	y4	56.57	2971676
LFPDAIK	Q5PQN2	A1	402.237	2	446.261	1	y4	56.38	3084992
LFPDAIK	Q5PQN2	A2	402.237	2	446.261	1	y4	56.75	3009984
LFPDAIK	Q5PQN2	A3	402.237	2	446.261	1	y4	56.38	3308778
LFPDAIK	Q5PQN2	N1	402.237	2	260.197	1	y2	56.24	5903809
LFPDAIK	Q5PQN2	N2	402.237	2	260.197	1	y2	56.32	5615850
LFPDAIK	Q5PQN2	N3	402.237	2	260.197	1	y2	56.65	3942536
LFPDAIK	Q5PQN2	M1	402.237	2	260.197	1	y2	56.69	4662575
LFPDAIK	Q5PQN2	M2	402.237	2	260.197	1	y2	56.34	6593580
LFPDAIK	Q5PQN2	M3	402.237	2	260.197	1	y2	56.57	5170365
LFPDAIK	Q5PQN2	A1	402.237	2	260.197	1	y2	56.38	4760159
LFPDAIK	Q5PQN2	A2	402.237	2	260.197	1	y2	56.75	6333830
LFPDAIK	Q5PQN2	A3	402.237	2	260.197	1	y2	56.38	5401558
LFPDAIK	Q5PQN2	N1	402.237	2	147.113	1	y1	56.3	5692348
LFPDAIK	Q5PQN2	N2	402.237	2	147.113	1	y1	56.36	5503534
LFPDAIK	Q5PQN2	N3	402.237	2	147.113	1	y1	56.65	7111939
LFPDAIK	Q5PQN2	M1	402.237	2	147.113	1	y1	56.71	18586854
LFPDAIK	Q5PQN2	M2	402.237	2	147.113	1	y1	56.42	25837724
LFPDAIK	Q5PQN2	M3	402.237	2	147.113	1	y1	56.61	15345586
LFPDAIK	Q5PQN2	A1	402.237	2	147.113	1	y1	56.48	15086989
LFPDAIK	Q5PQN2	A2	402.237	2	147.113	1	y1	56.75	20554132
LFPDAIK	Q5PQN2	A3	402.237	2	147.113	1	y1	56.5	19580566
VEDIQQNNDVVQSLAAFQK	Q5PQN2	N1	1073.54	2	991.557	1	y9	58.42	58336
VEDIQQNNDVVQSLAAFQK	Q5PQN2	N2	1073.54	2	991.557	1	y9	58.42	68066
VEDIQQNNDVVQSLAAFQK	Q5PQN2	N3	1073.54	2	991.557	1	y9	58.61	43465
VEDIQQNNDVVQSLAAFQK	Q5PQN2	M1	1073.54	2	991.557	1	y9	58.65	54393
VEDIQQNNDVVQSLAAFQK	Q5PQN2	M2	1073.54	2	991.557	1	y9	58.48	74609
VEDIQQNNDVVQSLAAFQK	Q5PQN2	M3	1073.54	2	991.557	1	y9	58.57	73876
VEDIQQNNDVVQSLAAFQK	Q5PQN2	A1	1073.54	2	991.557	1	y9	58.52	66278
VEDIQQNNDVVQSLAAFQK	Q5PQN2	A2	1073.54	2	991.557	1	y9	58.73	36698
VEDIQQNNDVVQSLAAFQK	Q5PQN2	A3	1073.54	2	991.557	1	y9	58.5	69337
VEDIQQNNDVVQSLAAFQK	Q5PQN2	N1	1073.54	2	764.43	1	y7	58.42	73791
VEDIQQNNDVVQSLAAFQK	Q5PQN2	N2	1073.54	2	764.43	1	y7	58.42	78928
VEDIQQNNDVVQSLAAFQK	Q5PQN2	N3	1073.54	2	764.43	1	y7	58.65	37520
VEDIQQNNDVVQSLAAFQK	Q5PQN2	M1	1073.54	2	764.43	1	y7	58.65	36305
VEDIQQNNDVVQSLAAFQK	Q5PQN2	M2	1073.54	2	764.43	1	y7	58.46	76502
VEDIQQNNDVVQSLAAFQK	Q5PQN2	M3	1073.54	2	764.43	1	y7	58.57	62557
VEDIQQNNDVVQSLAAFQK	Q5PQN2	A1	1073.54	2	764.43	1	y7	58.52	54551
VEDIQQNNDVVQSLAAFQK	Q5PQN2	A2	1073.54	2	764.43	1	y7	58.75	37139
VEDIQQNNDVVQSLAAFQK	Q5PQN2	A3	1073.54	2	764.43	1	y7	58.5	53249
VEDIQQNNDVVQSLAAFQK	Q5PQN2	N1	1073.54	2	493.277	1	y4	58.44	87237
VEDIQQNNDVVQSLAAFQK	Q5PQN2	N2	1073.54	2	493.277	1	y4	58.4	85208
VEDIQQNNDVVQSLAAFQK	Q5PQN2	N3	1073.54	2	493.277	1	y4	58.63	60386
VEDIQQNNDVVQSLAAFQK	Q5PQN2	M1	1073.54	2	493.277	1	y4	58.65	81423
VEDIQQNNDVVQSLAAFQK	Q5PQN2	M2	1073.54	2	493.277	1	y4	58.46	108595
VEDIQQNNDVVQSLAAFQK	Q5PQN2	M3	1073.54	2	493.277	1	y4	58.57	87299
VEDIQQNNDVVQSLAAFQK	Q5PQN2	A1	1073.54	2	493.277	1	y4	58.55	92550
VEDIQQNNDVVQSLAAFQK	Q5PQN2	A2	1073.54	2	493.277	1	y4	58.73	82082
VEDIQQNNDVVQSLAAFQK	Q5PQN2	A3	1073.54	2	493.277	1	y4	58.48	103373
DSPSAPVNVTVR	IS_HEAVY_PEPTIDE	N1	624.335	2	948.551	1	y9	41.5	19481090
DSPSAPVNVTVR	IS_HEAVY_PEPTIDE	N2	624.335	2	948.551	1	y9	41.83	19218778
DSPSAPVNVTVR	IS_HEAVY_PEPTIDE	N3	624.335	2	948.551	1	y9	42.3	24306942
DSPSAPVNVTVR	IS_HEAVY_PEPTIDE	M1	624.335	2	948.551	1	y9	42.14	27145878
DSPSAPVNVTVR	IS_HEAVY_PEPTIDE	M2	624.335	2	948.551	1	y9	41.45	21073850
DSPSAPVNVTVR	IS_HEAVY_PEPTIDE	M3	624.335	2	948.551	1	y9	41.91	22456934
DSPSAPVNVTVR	IS_HEAVY_PEPTIDE	A1	624.335	2	948.551	1	y9	41.66	47489272
DSPSAPVNVTVR	IS_HEAVY_PEPTIDE	A2	624.335	2	948.551	1	y9	42.36	23503128
DSPSAPVNVTVR	IS_HEAVY_PEPTIDE	A3	624.335	2	948.551	1	y9	41.52	27027724
DSPSAPVNVTVR	IS_HEAVY_PEPTIDE	N1	624.335	2	861.518	1	y8	41.5	16229963
DSPSAPVNVTVR	IS_HEAVY_PEPTIDE	N2	624.335	2	861.518	1	y8	41.83	16372908
DSPSAPVNVTVR	IS_HEAVY_PEPTIDE	N3	624.335	2	861.518	1	y8	42.3	20601508
DSPSAPVNVTVR	IS_HEAVY_PEPTIDE	M1	624.335	2	861.518	1	y8	42.16	19427982
DSPSAPVNVTVR	IS_HEAVY_PEPTIDE	M2	624.335	2	861.518	1	y8	41.45	16314230
DSPSAPVNVTVR	IS_HEAVY_PEPTIDE	M3	624.335	2	861.518	1	y8	41.91	17900872
DSPSAPVNVTVR	IS_HEAVY_PEPTIDE	A1	624.335	2	861.518	1	y8	41.66	40744616
DSPSAPVNVTVR	IS_HEAVY_PEPTIDE	A2	624.335	2	861.518	1	y8	42.38	17365446
DSPSAPVNVTVR	IS_HEAVY_PEPTIDE	A3	624.335	2	861.518	1	y8	41.5	21489488
DSPSAPVNVTVR	IS_HEAVY_PEPTIDE	N1	624.335	2	790.481	1	y7	41.5	93894488
DSPSAPVNVTVR	IS_HEAVY_PEPTIDE	N2	624.335	2	790.481	1	y7	41.83	93431344
DSPSAPVNVTVR	IS_HEAVY_PEPTIDE	N3	624.335	2	790.481	1	y7	42.3	116555232
DSPSAPVNVTVR	IS_HEAVY_PEPTIDE	M1	624.335	2	790.481	1	y7	42.16	106700352
DSPSAPVNVTVR	IS_HEAVY_PEPTIDE	M2	624.335	2	790.481	1	y7	41.45	95204464
DSPSAPVNVTVR	IS_HEAVY_PEPTIDE	M3	624.335	2	790.481	1	y7	41.91	105475576
DSPSAPVNVTVR	IS_HEAVY_PEPTIDE	A1	624.335	2	790.481	1	y7	41.66	227595296
DSPSAPVNVTVR	IS_HEAVY_PEPTIDE	A2	624.335	2	790.481	1	y7	42.38	101101592
DSPSAPVNVTVR	IS_HEAVY_PEPTIDE	A3	624.335	2	790.481	1	y7	41.52	127251968

## Sheet: S3
Target Peptide Fragment PRM Ana
		Original peak area									Corrected peak area									Average peptide content			Ratio between two groups			TTEST
Peptide Sequence	Protein Name	N1	N2	N3	M1	M2	M3	A1	A2	A3	N1	N2	N3	M1	M2	M3	A1	A2	A3	N_mean	M_mean	A_mean	Ratio_M/N	Ratio_A/N	Ratio_A/M	TTEST_M/N	TTEST_A/N	TTEST_A/M
TGPNLHGLFGR	D4A5L9	282100000	300580000	306660000	240540000	361990000	357850000	328970000	292240000	384030000	2.1766	2.32966	1.89925	1.56934	2.73009	2.45383	2.07069	2.05846	2.18485	2.13517	2.25109	2.10467	1.05429	0.985714	0.934956	0.770937	0.828887	0.699089
TGQAAGFSYTDANK	D4A5L9	437260000	649640000	516760000	584630000	646800000	471620000	455080000	384620000	340580000	3.37378	5.03507	3.20047	3.81428	4.8781	3.23396	2.86449	2.70916	1.93765	3.86977	3.97545	2.50377	1.02731	0.647006	0.629808	0.895788	0.103941	0.0583828
ADLIAYLK	D4A5L9	112350000	351320000	124590000	200800000	152770000	98920000	96621000	78688000	84163000	0.866861	2.72292	0.771629	1.31007	1.15218	0.678308	0.608178	0.554257	0.478827	1.4538	1.04685	0.547087	0.720077	0.376314	0.522602	0.572486	0.227264	0.0611456
LFPDAIK	Q5PQN2	14914000	14565000	13629000	25885000	36285000	23488000	22932000	29898000	28291000	0.115072	0.112887	0.0844091	0.16888	0.273658	0.161061	0.144345	0.210594	0.160955	0.104123	0.2012	0.171965	1.93233	1.65156	0.854696	0.0612941	0.0378949	0.519017
VEDIQQNNDVVQSLAAFQK	Q5PQN2	219360	232200	141370	172120	259710	223730	213380	155920	225960	0.00169252	0.00179968	0.000875553	0.00112295	0.00195871	0.00153415	0.00134311	0.00109826	0.00128555	0.00145592	0.0015386	0.00124231	1.05679	0.853282	0.807425	0.837828	0.517144	0.305453
DSPSAPVNVTVR	IS_HEAVY_PEPTIDE	129605541	129023030	161463682	153274212	132592544	145833382	158869673	141970166	175769180	1	1	1	1	1	1	1	1	1	1	1	1	1	1	1	#DIV/0!	#DIV/0!	#DIV/0!
Target Protein PRM Analysis
	Corrected peak area									Average peptide content			Ratio between two groups			TTEST
Protein Name	N1	N2	N3	M1	M2	M3	A1	A2	A3	N_mean	M_mean	A_mean	Ratio_M/N	Ratio_A/N	Ratio_A/M	TTEST_M/N	TTEST_A/N	TTEST_A/M
D4A5L9	2.13908	3.36255	1.95712	2.23123	2.92012	2.12203	1.84779	1.77396	1.53378	2.48625	2.42446	1.71851	0.975148	0.691205	0.70882	0.908898	0.164168	0.057461
Q5PQN2	0.0583824	0.0573433	0.0426423	0.0850016	0.137808	0.0812973	0.0728439	0.105846	0.0811205	0.0527893	0.101369	0.0866034	1.92026	1.64055	0.854338	0.0623602	0.0385799	0.516387
